# Supplementary material
Source: PubMed Central journal article supplement (PMC4819807)
Supplement: jf5b06009_si_001.pdf [file jf5b06009_si_001.pdf]

## SUPPLEMENTARY MATERIALS

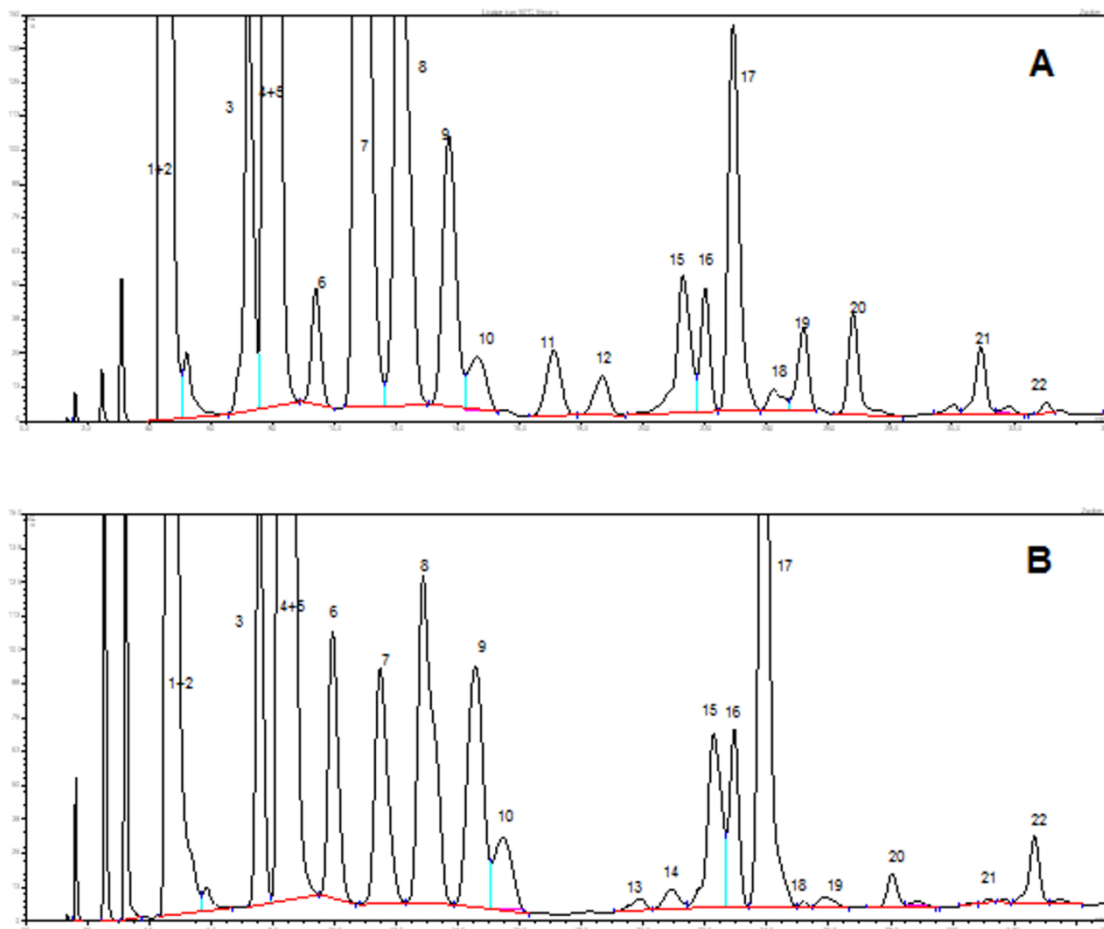

**Figure S1.** Separation and quantification by HPAEC-PAD of individual GOS produced during lactose conversion catalyzed by (A) *L. bulgaricus*  $\beta$ -gal and (B) *B. breve*  $\beta$ -gal I. The identified compounds are (1) D-Gal, (2) D-Glc, (3)  $\beta$ -D-Galp-(1 $\rightarrow$ 6)-D-Gal, (4)  $\beta$ -D-Galp-(1 $\rightarrow$ 6)-D-Glc (allolactose), (5)  $\beta$ -D-Galp-(1 $\rightarrow$ 4)-D-Glc (lactose), (6)  $\beta$ -D-Galp-(1 $\rightarrow$ 3)-D-Gal, (7)  $\beta$ -D-Galp-(1 $\rightarrow$ 6)- $\beta$ -D-Galp-(1 $\rightarrow$ 4)-D-Glc, (9)  $\beta$ -D-Galp-(1 $\rightarrow$ 3)-D-Glc, (15)  $\beta$ -D-Galp-(1 $\rightarrow$ 3)- $\beta$ -D-Galp-(1 $\rightarrow$ 4)-D-Glc, (17)  $\beta$ -D-Galp-(1 $\rightarrow$ 4)- $\beta$ -D-Galp-(1 $\rightarrow$ 4)-D-Glc. Peaks 8, 10-14, 16, 18-22 were not identified.

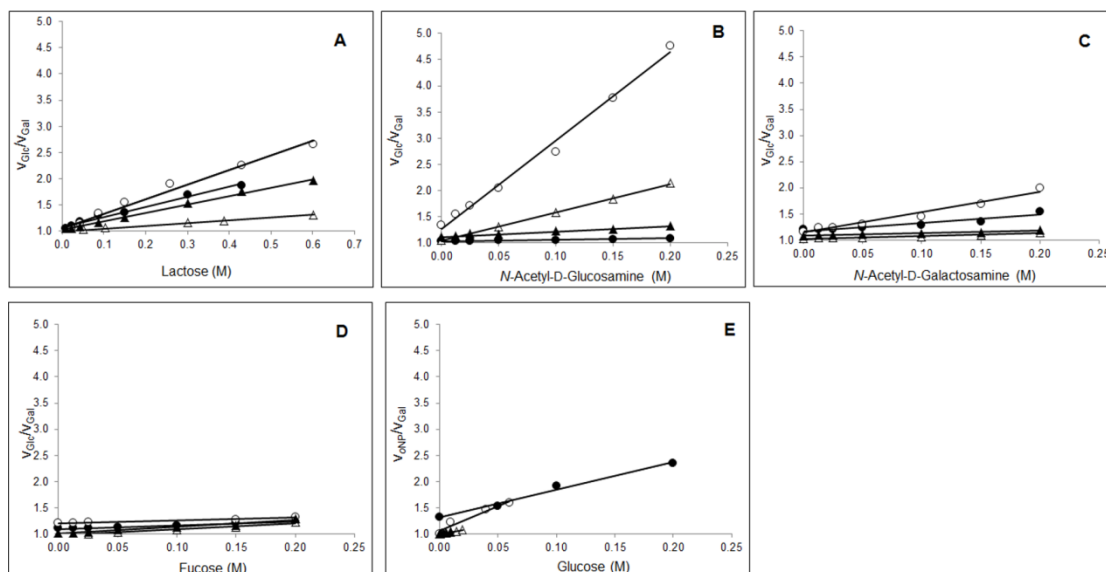

**Figure S2.** Ratio of initial velocities  $v_{Glu}/v_{Gal}$  in the presence of different exogenous nucleophiles, which are lactose (A), *N*-acetyl-D-glucosamine (B), *N*-acetyl-D-galactosamine (C), L- fucose (D); and  $v_{0NP}/v_{Gal}$  in the presence of D-Glucose (E). The enzymes are  $\beta$ -galactosidases from *L. reuteri* ( $\bullet$ ), *L. bulgaricus* ( $\circ$ ), *B. breve*  $\beta$ -gal I ( $\blacktriangle$ ), and *B. breve*  $\beta$ -gal II ( $\triangle$ ).

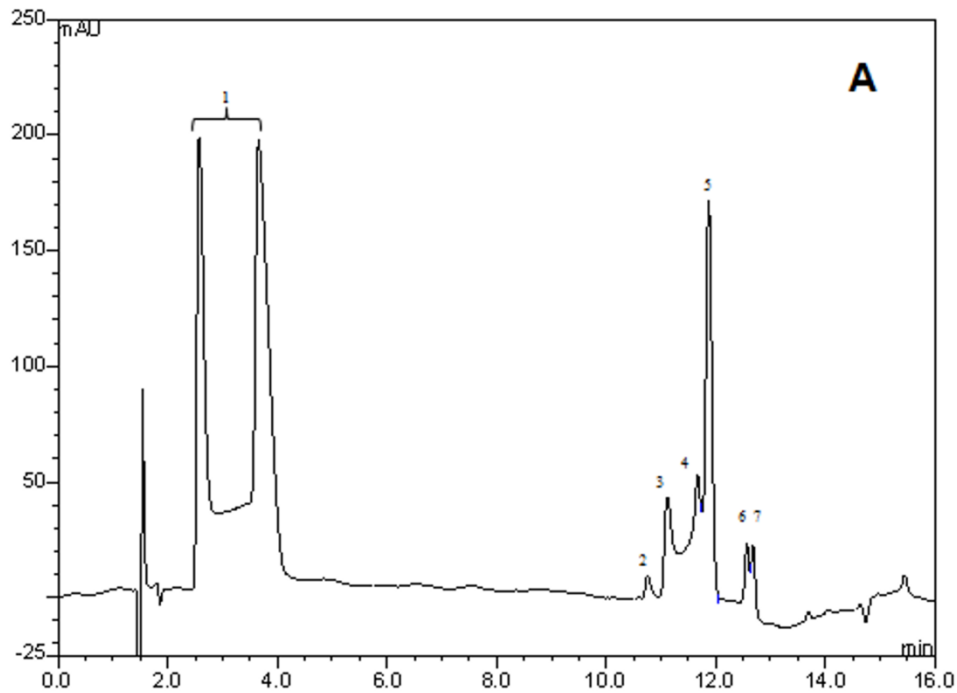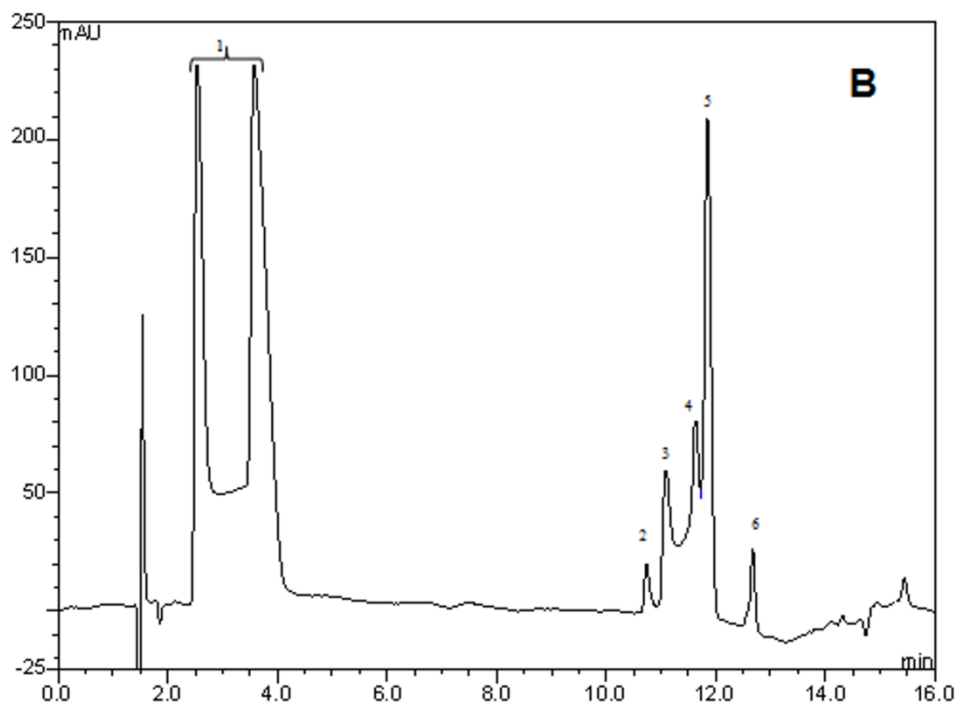

**Figure S3.** HPLC-UV chromatogram of *N*-acetyl oligosaccharides produced by  $\beta$ -galactosidases from (A) *L. bulgaricus* and (B) *B. breve*  $\beta$ gal-II using equimolar concentration of lactose and GlcNAc dissolved in 50 mM sodium phosphate buffer (pH 6.5) containing 1 mM  $MgCl_2$ . Peak Identification: (1) the anomeric isomers of GlcNAc, (3) and (5) the anomeric isomers of Galp-(1 $\rightarrow$ 6)-D-GlcNAc. Peaks 2, 4, 6 and 7 were not identified.

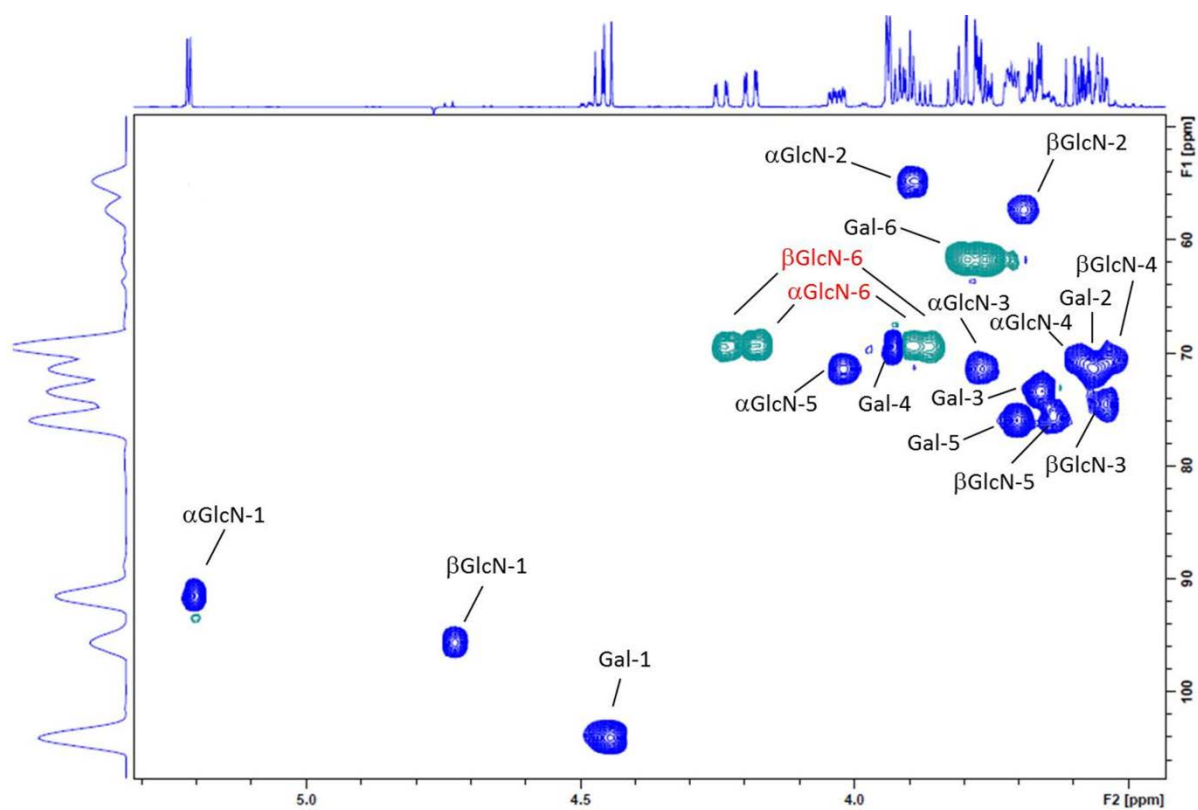

**Figure S4.** Multiplicity edited HSQC spectrum of  $\beta\text{-D-Galp-(1}\rightarrow\text{6)-D-GlcNAc}$ .

**Table S1.** NMR assignments<sup>a</sup> for *N*-acetyl-allolactosamine

| Residue      | Position  | <sup>1</sup> H<br>δ (ppm) | <i>J</i><br>(Hz)  | <sup>13</sup> C<br>δ (ppm) |
|--------------|-----------|---------------------------|-------------------|----------------------------|
| β-Galp-(1→6) | 1         | 4.47 (β)                  | 7.9               | 104.1                      |
|              | 1         | 4.45 (α)                  | 7.9               | 104.1                      |
|              | 2         | 3.57                      | 10.0              | 71.3                       |
|              | 3         | 3.67                      | 3.4               | 73.4                       |
|              | 4         | 3.94                      | <1.0              | 69.5                       |
|              | 5         | 3.71                      | n.d. <sup>b</sup> | 75.9                       |
|              | 6a        | 3.81                      | 7.9, 11.8         | 61.7                       |
|              | 6b        | 3.76                      | 2.3               |                            |
| α-GlcpNAc    | 1         | 5.21                      | 3.6               | 91.6                       |
|              | 2         | 3.90                      | 10.7              | 54.7                       |
|              | 3         | 3.78                      | 9.4               | 71.4                       |
|              | 4         | 3.60                      | 10.0              | 70.7                       |
|              | 5         | 4.03                      | 2.1               | 71.4                       |
|              | 6a        | 4.19                      | 11.4              | 69.4                       |
|              | 6b        | 3.91                      | 5.5               |                            |
|              | β-GlcpNAc | 1                         | 4.74              | 8.3                        |
| 2            |           | 3.71                      | n.d.              | 57.3                       |
| 3            |           | 3.55                      | n.d.              | 74.5                       |
| 4            |           | 3.54                      | n.d.              | 70.7                       |
| 5            |           | 3.65                      | 9.6               | 75.5                       |
| 6a           |           | 4.24                      | 2.0, 11.5         | 69.4                       |
| 6b           |           | 3.88                      | 5.9               |                            |
| NHAc         |           | CH <sub>3</sub>           | 2.06              |                            |

<sup>a</sup> Spectra were recorded at 300 K. <sup>13</sup>C shifts were referenced to 1,4-dioxane (δ 67.40) and derived from HSQC spectra.

<sup>b</sup> n.d. Not determined.
